# Supplementary material for: Licochalcone A attenuates glioma cell growthin vitroandin vivothrough cell cycle arrest
Source: Royal Society of Chemistry journal article supplement (doi:10.1039/c8fo00728d), 2018-01-01
Supplement: c8fo00728d1.pdf [file c8fo00728d1.pdf]

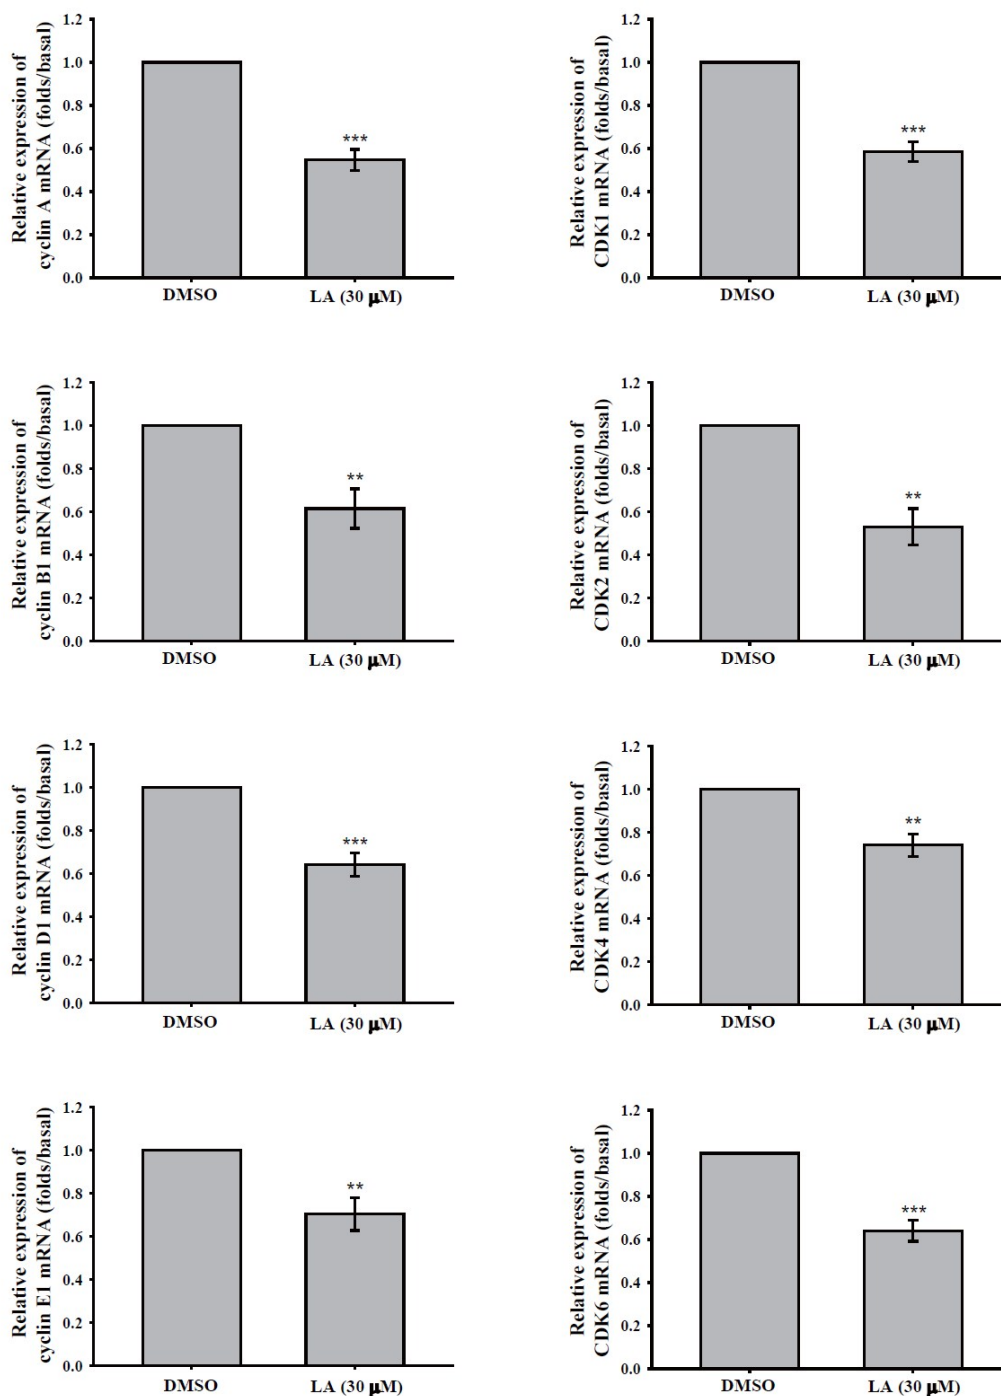

**Supplementary Fig. 1** Effects of LA on mRNA expression of cyclins and CDKs of glioma cells. The cells ( $4 \times 10^5$ ) were cultured in 6-cm dishes. After reaching 80% confluence, the cells were treated with DMSO or 30  $\mu$ M LA for 48 h. Total RNA was extracted and converted to cDNA. Specific primers were used to detect the gene expression of cyclins and CDKs through real-time PCR. Each sample was examined in triplicate, and the amounts of the PCR products produced were normalized to GAPDH, as an internal control. Data are presented as mean  $\pm$  SEM. ( $n = 4$ ). \*\* $p < 0.01$  and \*\*\* $p < 0.001$ , compared with the DMSO group.
