# Supplementary material for: Licochalcone A attenuates glioma cell growthin vitroandin vivothrough cell cycle arrest
Source: Royal Society of Chemistry journal article supplement (doi:10.1039/c8fo00728d), 2018-01-01
Supplement: c8fo00728d2.pdf [file c8fo00728d2.pdf]

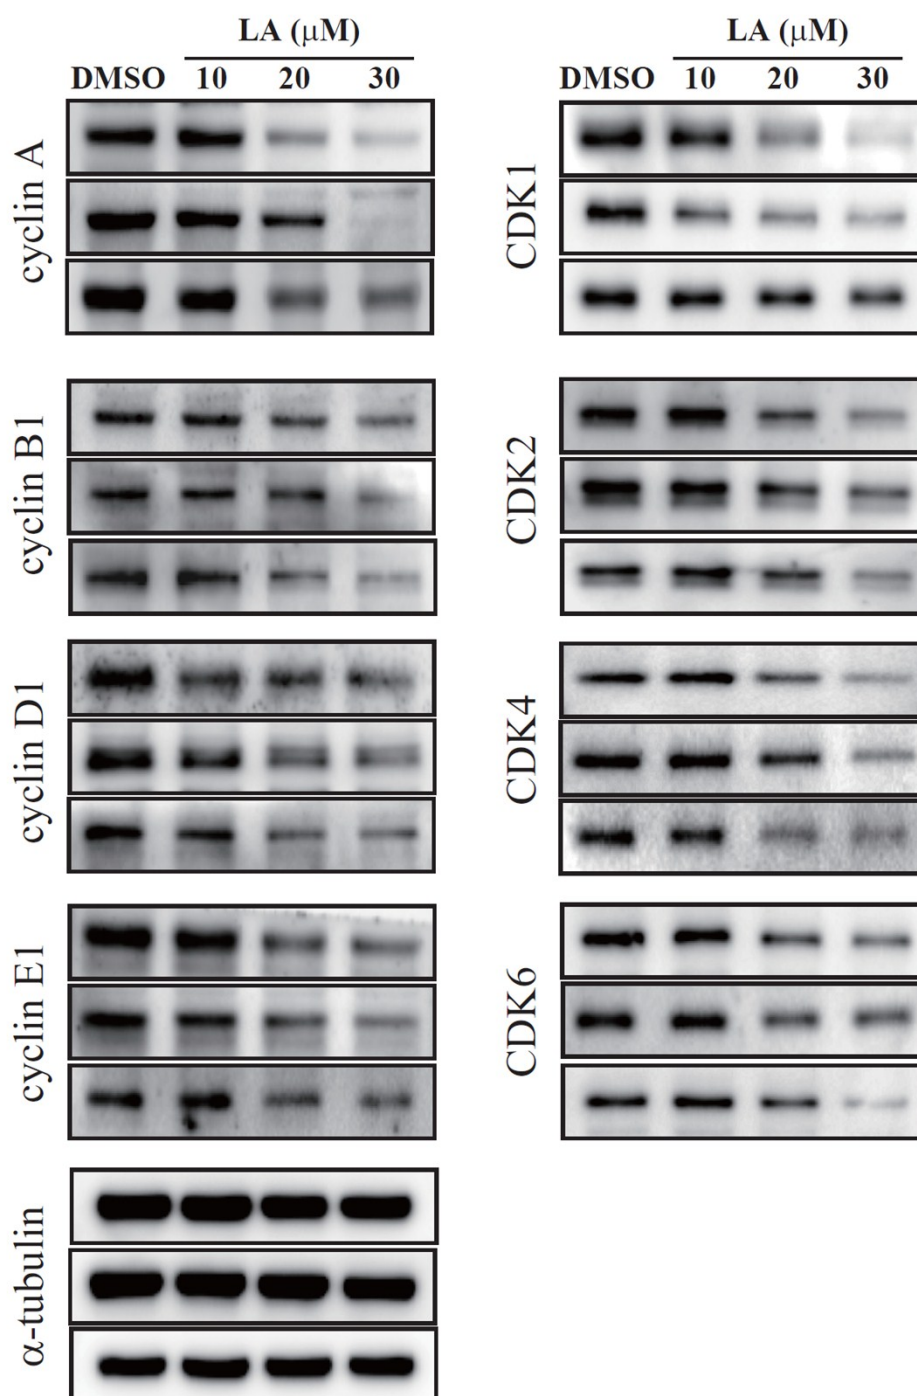

**Supplementary Fig. 2** Effects of LA on protein expression of cyclins and CDKs of glioma cells. The cells ( $4 \times 10^5$ ) were cultured in 6-cm dishes. After reaching 80% confluence, the cells were treated with DMSO or LA (10, 20, or 30 μM) for 48 h. Subsequently, they were collected, and subcellular extracts were analyzed through immunoblotting. Specific antibodies were used to detect cyclins and CDKs. The experiments were repeated three times ( $n = 3$ ).
